# Supplementary material
Source: HighWire-hosted journal article supplement (https://bmjopen.bmj.com/content/9/10/e032906)

Residual standardised rate ratios (SRRs) for Emergency Department attendance and admission for self-harm for 725 Lower Super Output Areas (LSOAs) in study area

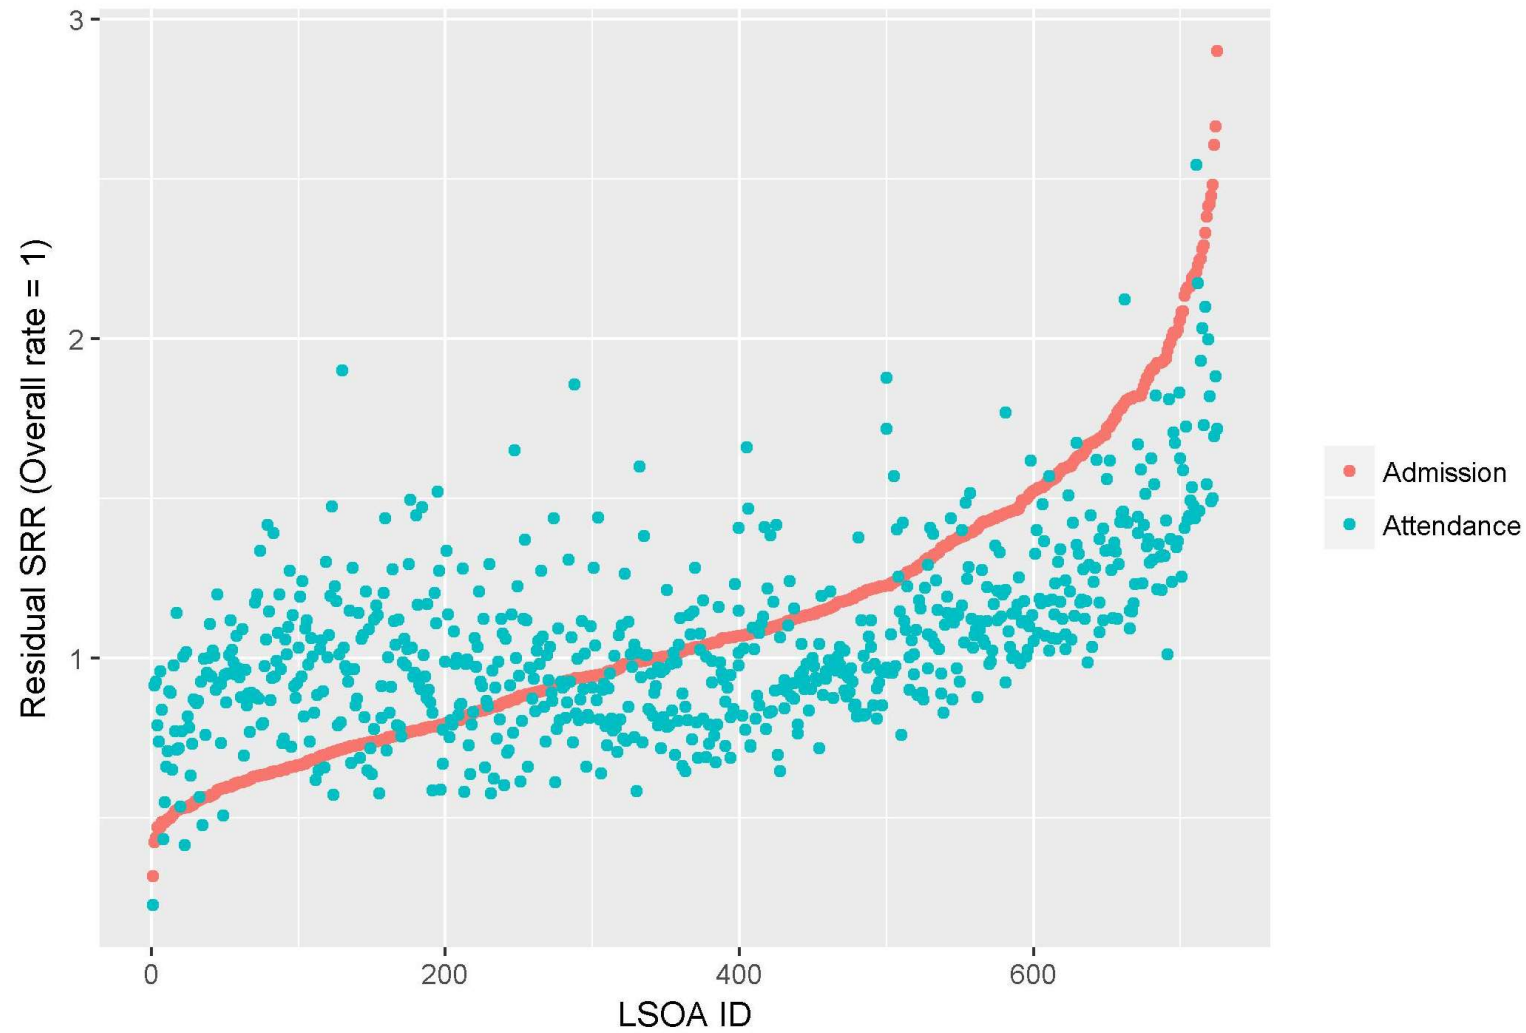

Supplement: inline-supplementary-material-2 [file inline-supplementary-material-2.pdf]
