# Supplementary material
Source: HighWire-hosted journal article supplement (https://bmjopen.bmj.com/content/9/10/e032906)
Supplement: inline-supplementary-material-3 [file inline-supplementary-material-3.pdf]

a) First attendances b) First attendances adjusted for distance to hospital and c) First admissions by individuals aged 11+ for self-harm 2009-2016 by lower super output area, standardised for age and sex and adjusted for IMD

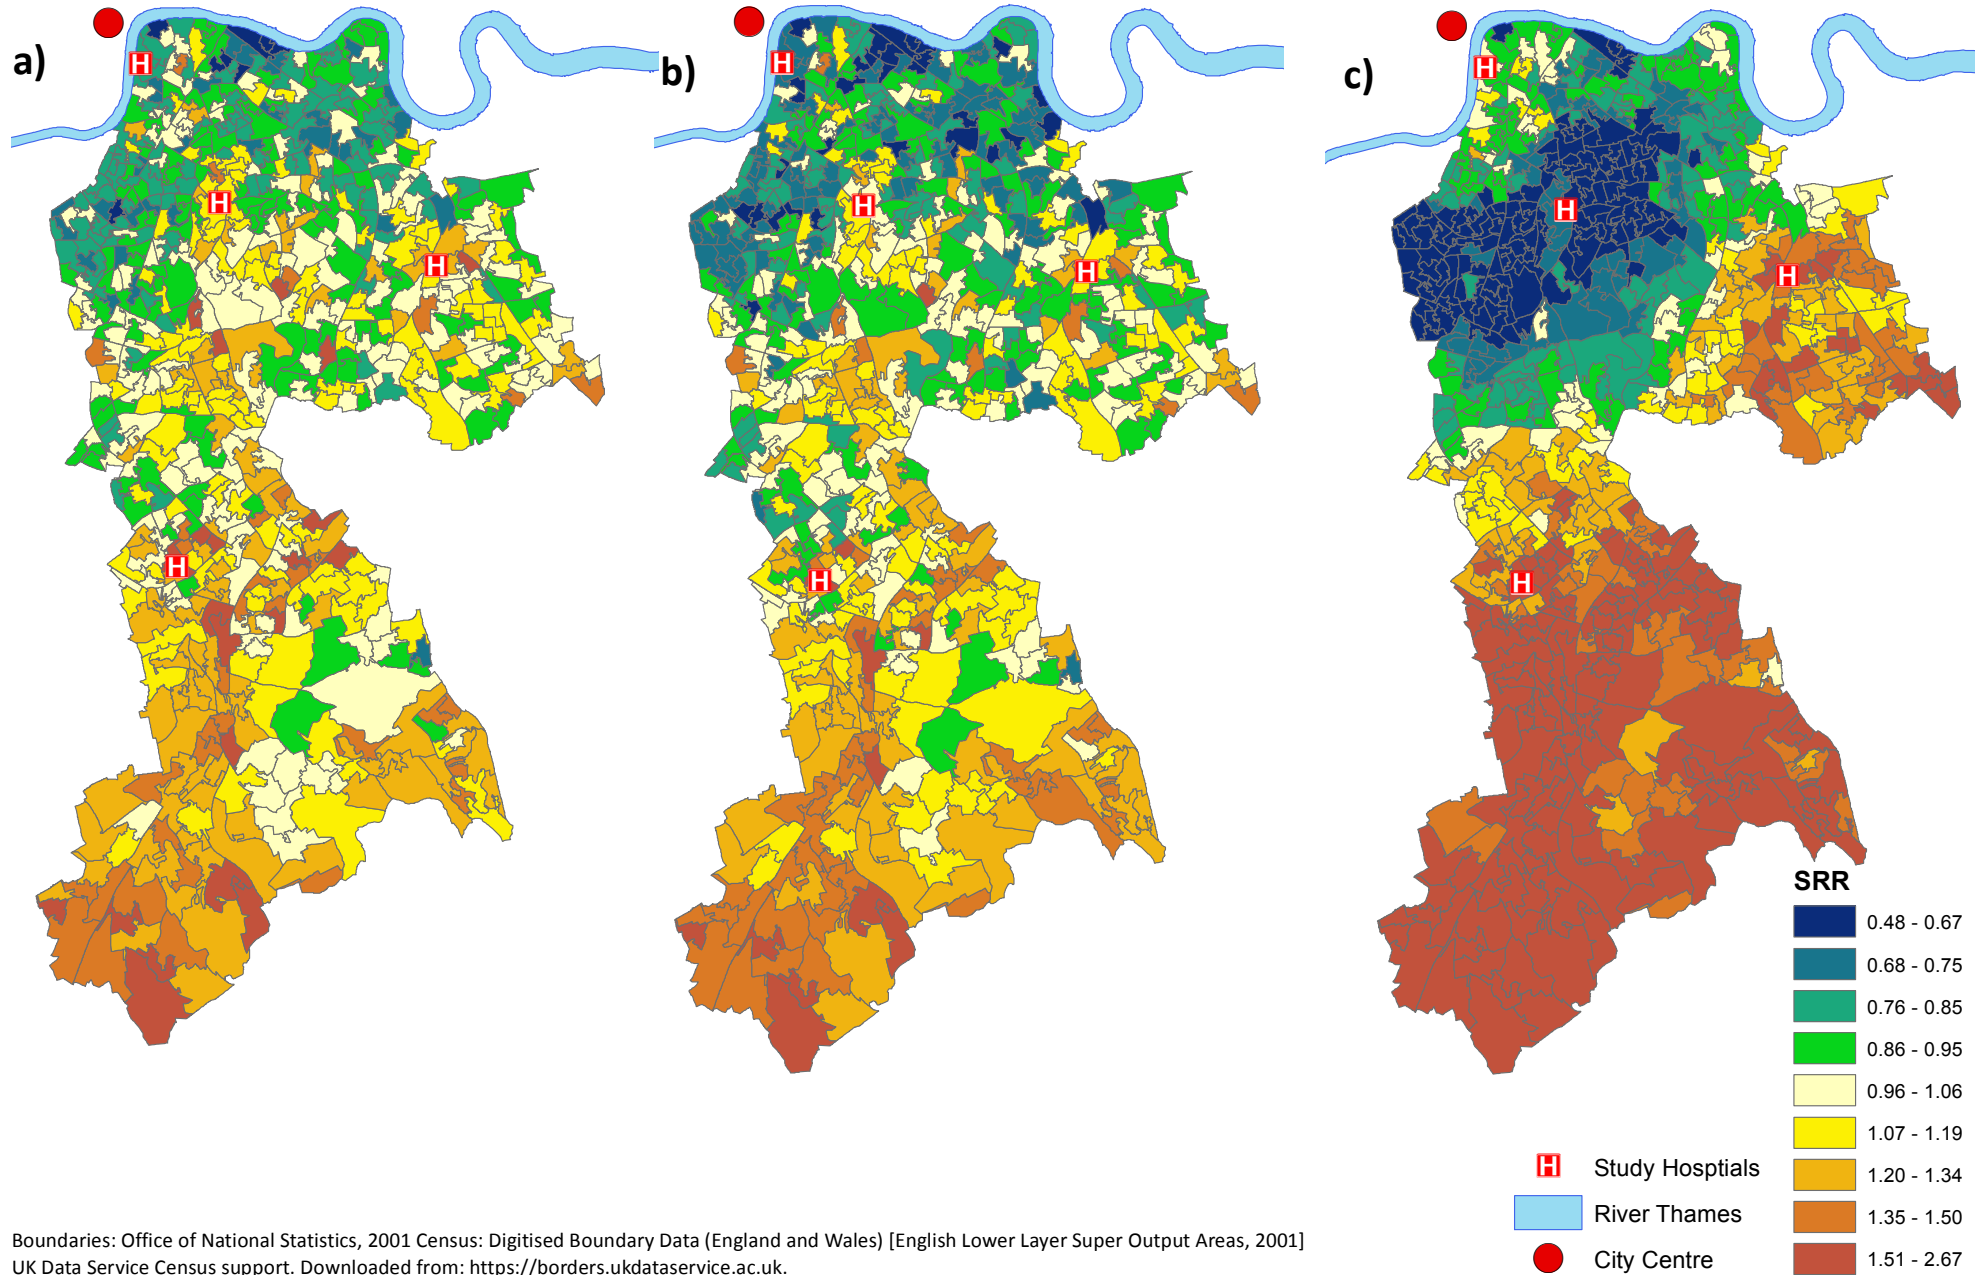

Boundaries: Office of National Statistics, 2001 Census: Digitised Boundary Data (England and Wales) [English Lower Layer Super Output Areas, 2001]  
UK Data Service Census support. Downloaded from: <https://borders.ukdataservice.ac.uk>.
